# Supplementary material for: Accessing Sexual Health Information Online: Content, Reasons and Practical Barriers in Emerging Adults
Source: MDPI journal article supplement (doi:10.3390/youth3010007), 2023-01-13
Supplement: s1 [file s1]

**Table S1.** Breakdown of ‘other (please specify)’ responses for sex-related topics searched for on the Internet ( $n = 40$ ). Responses were open-ended, therefore participants could indicate multiple topics.

| Topic                                                                            | <i>n</i> (%) |
|----------------------------------------------------------------------------------|--------------|
| Pregnancy and abortion                                                           | 7 (17.5)     |
| Contraception                                                                    | 5 (12.5)     |
| Gender and sexuality                                                             | 5 (12.5)     |
| Sexual violence                                                                  | 3 (9.4)      |
| Sex-positivity (plesaure, sex toys, fantasies)                                   | 3 (9.4)      |
| Medical information (anatomy, sexual organs, sexual dysfunction)                 | 3 (9.4)      |
| BDSM (Bondage and Discipline, Dominance and Submission, Sadochism and Masochism) | 2 (5.0)      |
| Anything about sex                                                               | 2 (5.0)      |
| Sexually transmitted infections                                                  | 2 (5.0)      |
| Advice                                                                           | 1 (2.5)      |
| Pornography                                                                      | 1 (2.5)      |
| Sex positions                                                                    | 1 (2.5)      |
| Teaching resources                                                               | 1 (2.5)      |
| Social media platform                                                            | 1 (2.5)      |
| Do not search for sex-related topics / did not specify topic                     | 4 (10.0)     |

**Table S2.** Breakdown of ‘other (please specify)’ responses for reasons for conducting online searches ( $n = 20$ ). Responses were open-ended, therefore participants could indicate multiple topics.

| Reason                                     | <i>n</i> (%) |
|--------------------------------------------|--------------|
| Easily accessible and convenient           | 4 (20.0)     |
| To help or inform others                   | 3 (15.0)     |
| To book appointments / go to a doctor      | 2 (10.0)     |
| Work-related                               | 2 (10.0)     |
| To engage with other peoples’ experiences  | 2 (10.0)     |
| Plethora of available information          | 2 (10.0)     |
| To explore contraceptive options           | 2 (10.0)     |
| Inexperience or uncertainty                | 2 (10.0)     |
| Specific medical problem                   | 1 (5.0)      |
| Poor sex education and guidance growing up | 1 (5.0)      |
| Do not conduct online searches             | 2 (10.0)     |
